# Supplementary material
Source: Springer Nature journal article supplement (https://www.springermedizin.de/resource/supplementary/12985_2010_1124_MOESM6_ESM.pdf/9610382)

1 2 3 4 5 6 7 8 9 10 11 12

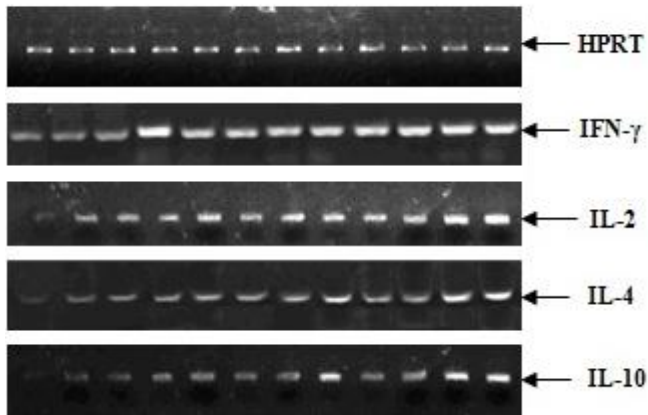

Supplement: MOESM6 [file 9610382]
